# Supplementary material for: Controlled Synthesis of Up-Conversion NaYF4:Yb,Tm Nanoparticles for Drug Release under Near IR-Light Therapy
Source: MDPI journal article supplement (doi:10.3390/biomedicines9121953), 2021-12-20
Supplement: s1 [file s1]

## **Supplementary Information**

### **Controlled Synthesis of Up-Conversion NaYF<sub>4</sub>:Yb,Tm Nanoparticles for Drug Release Under Near IR-Light Therapy**

Edelweiss Moyano Rodríguez<sup>a,b</sup>, Miguel Gomez-Mendoza<sup>b</sup>, Raúl Pérez-Ruiz<sup>b,c</sup>, Beatriz Peñín<sup>d</sup>, Diego Sampedro<sup>d</sup>, Antonio Caamaño<sup>a</sup>, Víctor A. de la Peña O'Shea<sup>b</sup>

[a] Signal theory and communications and telematic system and computing, Rey Juan Carlos University, Cam/ del Molin 5; 28942 Fuenlabrada, Madrid, Spain.

[b] Photoactivated Processes Unit IMDEA Energy Institute, C/ Ramón de la Sagra, 3 28935 Móstoles, Madrid, Spain.

[c] Departamento de Química, Universitat Politècnica de Valencia, Camno de Vera S/N, 46022, Valencia, Spain.

[d] Departamento de Química, Centro de Investigación en Síntesis Química (CISQ), Universidad de La Rioja, Madre de Dios, 53, 26006, Logroño, Spain.

## **Table of contents**

|                                                                                                                                                                                                                                                                                                                                                                                                                                       |            |
|---------------------------------------------------------------------------------------------------------------------------------------------------------------------------------------------------------------------------------------------------------------------------------------------------------------------------------------------------------------------------------------------------------------------------------------|------------|
| <b>Scheme S1.</b> Synthetic route for the dyads <b>CF (1)</b> and <b>CF-OE (2)</b>                                                                                                                                                                                                                                                                                                                                                    | <b>S3</b>  |
| <b>Figure S1.</b> $^1\text{H}$ (up) and $^{13}\text{C}$ (down) NMR of <b>CF-OE 2</b>                                                                                                                                                                                                                                                                                                                                                  | <b>S4</b>  |
| <b>Figure S2.</b> Mass spectrometer characterization data of <b>CF-OE 2</b>                                                                                                                                                                                                                                                                                                                                                           | <b>S5</b>  |
| <b>Figure S3.</b> TEM images of A) UC1; B) UC2 and; C) UC3                                                                                                                                                                                                                                                                                                                                                                            | <b>S6</b>  |
| <b>Figure S4.</b> TEM images of A) UC4; B) UC5, C) UC6 and; D) UC7. Inset in figure S2C correspond to electron diffraction of red squared area                                                                                                                                                                                                                                                                                        | <b>S7</b>  |
| <b>Figure S5.</b> Absorption spectra of CF-OE (0.5 mM) in the presence of increasing amounts of formic acid (% v/v). Inset: zoom image.                                                                                                                                                                                                                                                                                               | <b>S8</b>  |
| <b>Figure S6.</b> A) Transient absorption spectrum (TAS, $\lambda_{\text{exc}} = 355 \text{ nm}$ ) for CF in deaerated dichloromethane solution immediately after the laser pulse and B) upon 100 ns for CF (red), CF-OE (black) or CF-OE in acidic media (blue) in deaerated dichloromethane solutions. Inset: decay trace monitored at 650 nm for CF-OE as model                                                                    | <b>S9</b>  |
| <b>Figure S7.</b> A and B) HPLC chromatograms for CF (A) and CF-OE (B) upon increasing concentration in aerated 70:50 $\text{H}_2\text{O} : \text{CH}_3\text{CN}$ , containing 0.1% of FA. Inset: corresponding linear calibration curve. C and D) Calibration curve for CF (C) and CF-OE (D). The measurements were performed by triplicated for each compound                                                                       | <b>S10</b> |
| <b>Figure S8.</b> HPLC chromatograms of the evolution formation of free CF (red) and disappearance of CF-OE compound (blue) upon increasing irradiation times ( $\lambda_{\text{exc}} = 980 \text{ nm}$ ), at 0.5 M of CF-OE in deaerated methylene chloride (10 % FA v/v). The mobile phase used in HPLC analysis was 70:50 $\text{H}_2\text{O}:\text{CH}_3\text{CN}$ , containing 0.1% of FA                                        | <b>S11</b> |
| <b>Figure S9.</b> HPLC chromatograms of the formation of the benzophenone (BP) as a second product upon increasing irradiation times ( $\lambda_{\text{exc}} = 980 \text{ nm}$ ), at 0.5 mM of CF-OE in deaerated methylene chloride (10 % FA v/v). The mobile phase used in HPLC analysis was 70:50 $\text{H}_2\text{O} : \text{CH}_3\text{CN}$ , containing 0.1% of FA. The orange trace corresponds to the commercial BP reference | <b>S12</b> |
| <b>Figure S10.</b> Reusability of UC3 by monitoring the conversion rate of the formation of CF upon increasing irradiation times ( $\lambda_{\text{exc}} = 980 \text{ nm}$ ) during five consecutive cycles. Cycle 1 to 5: black, red, blue, green and purple, respectively                                                                                                                                                           | <b>S13</b> |

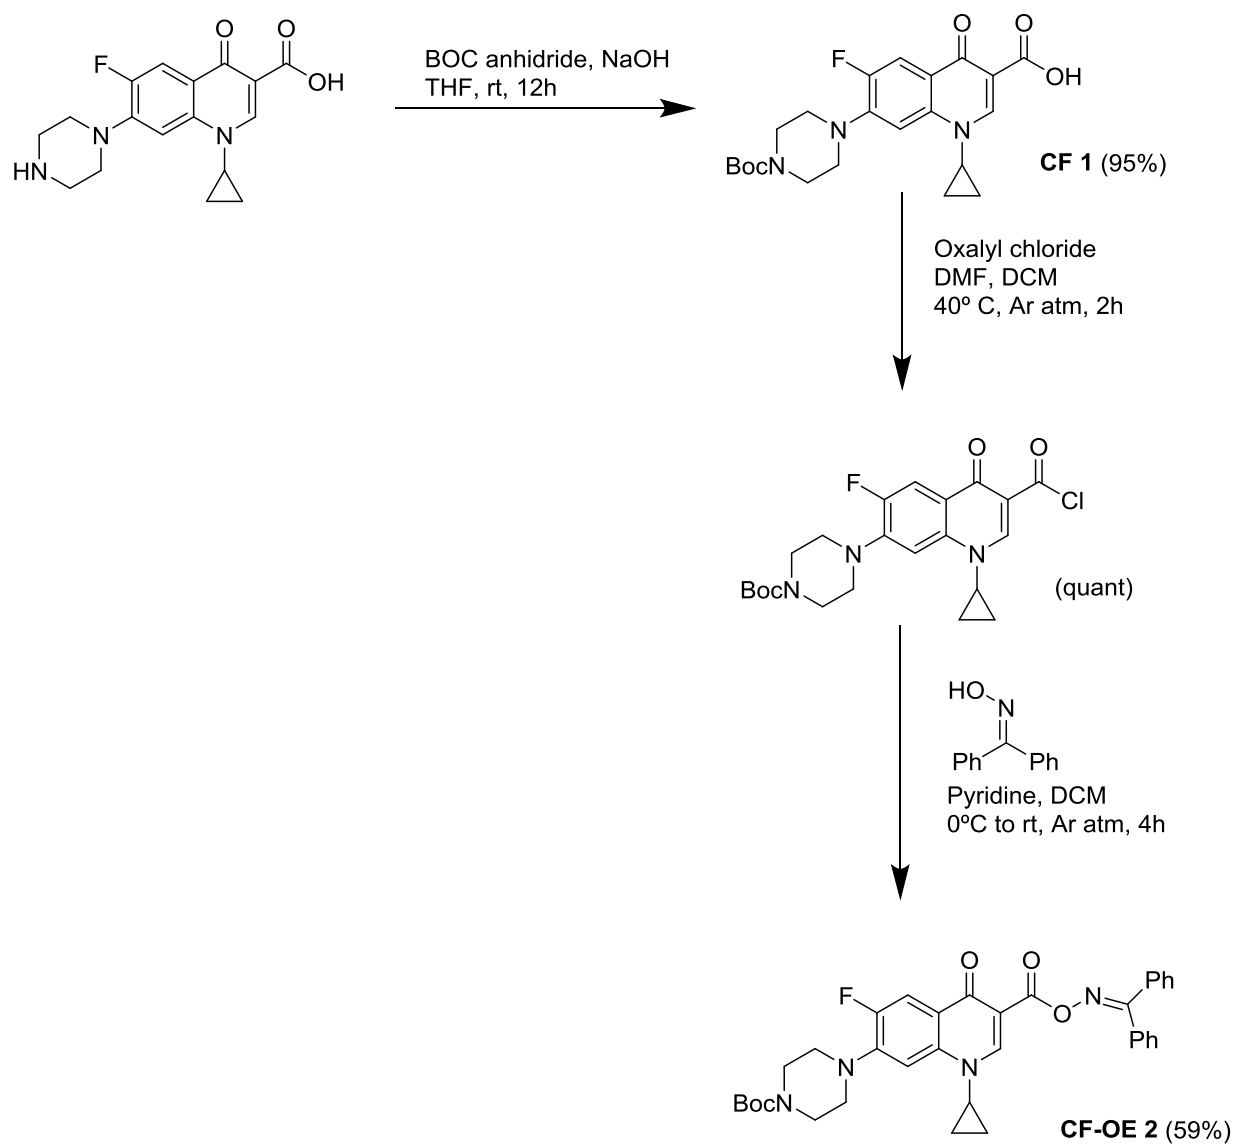

**Scheme S1.** Synthetic route for the dyads ciprofloxacin **CF 1** and its corresponding oxime-ester derivative **CF-OE 2**.

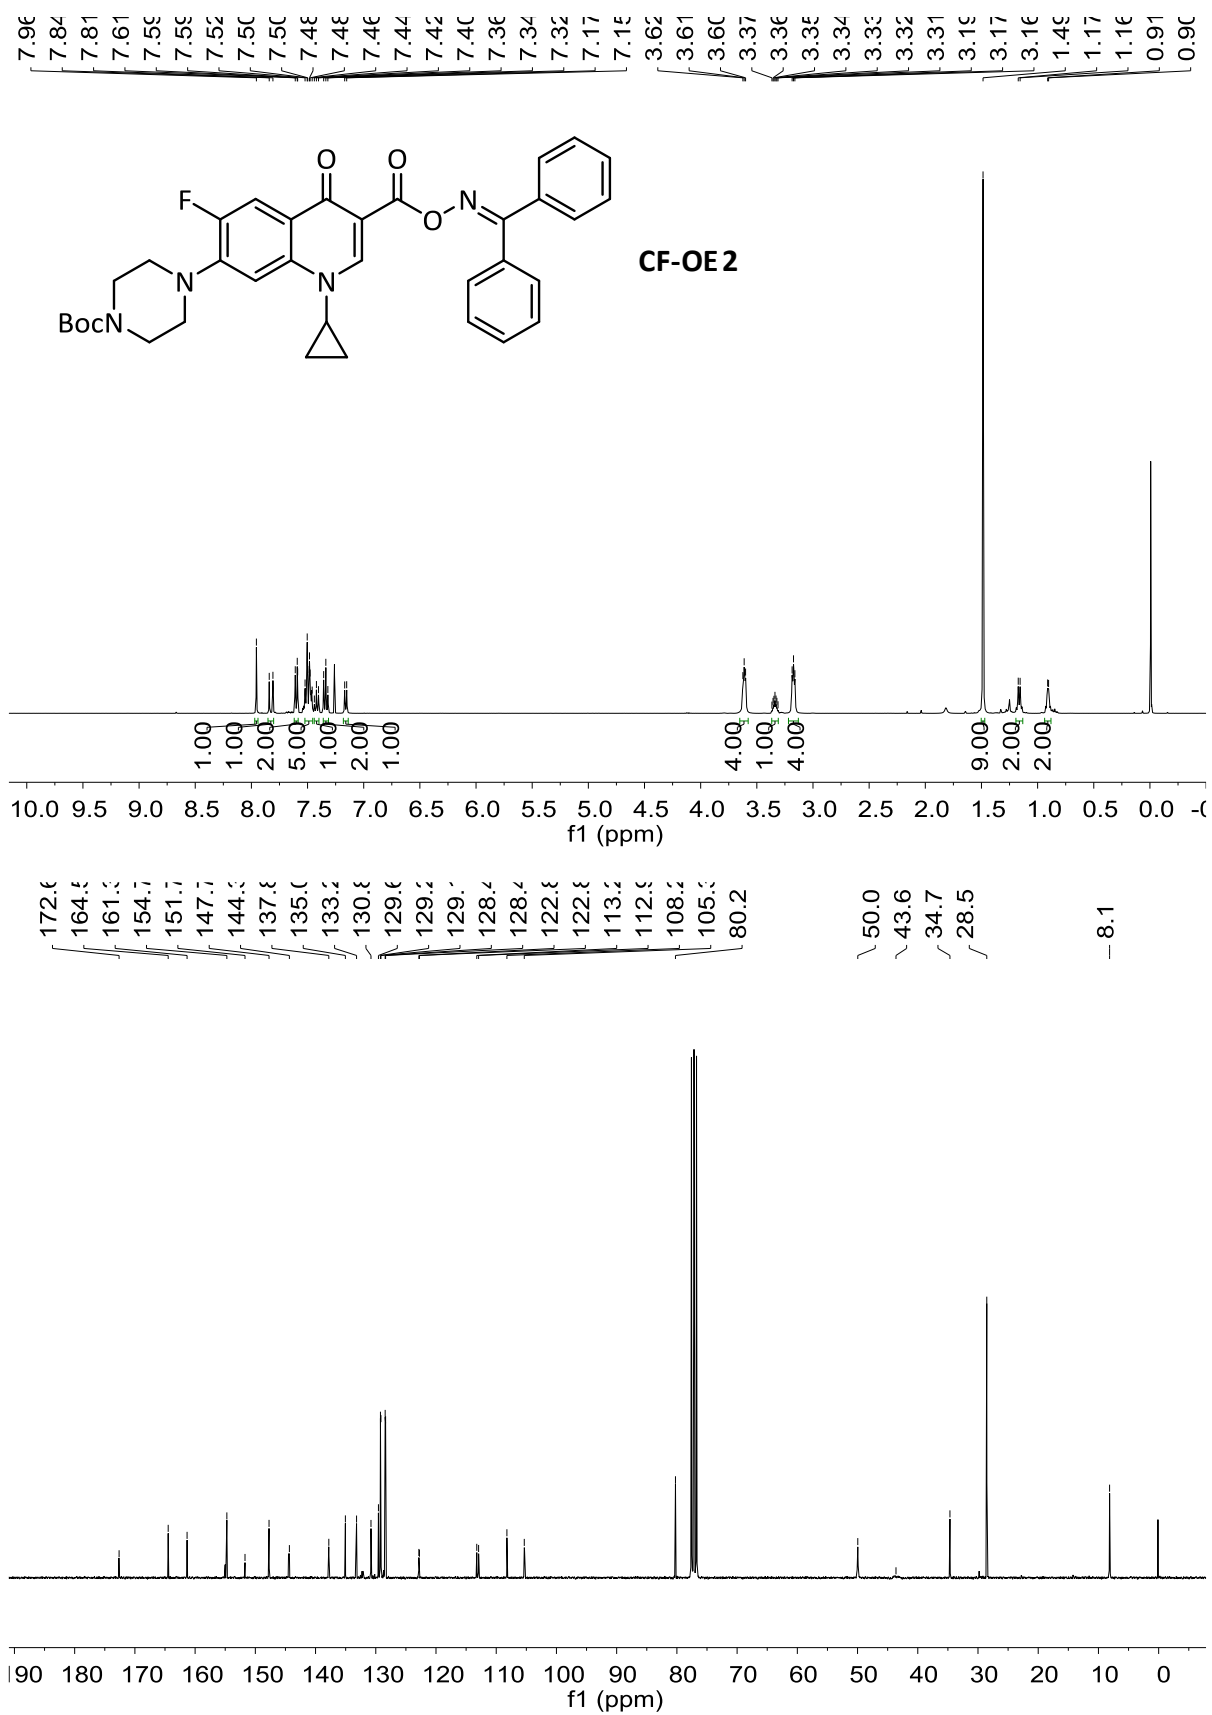

**Figure S1.** <sup>1</sup>H (up) and <sup>13</sup>C (down) NMR of **CF-OE 2**

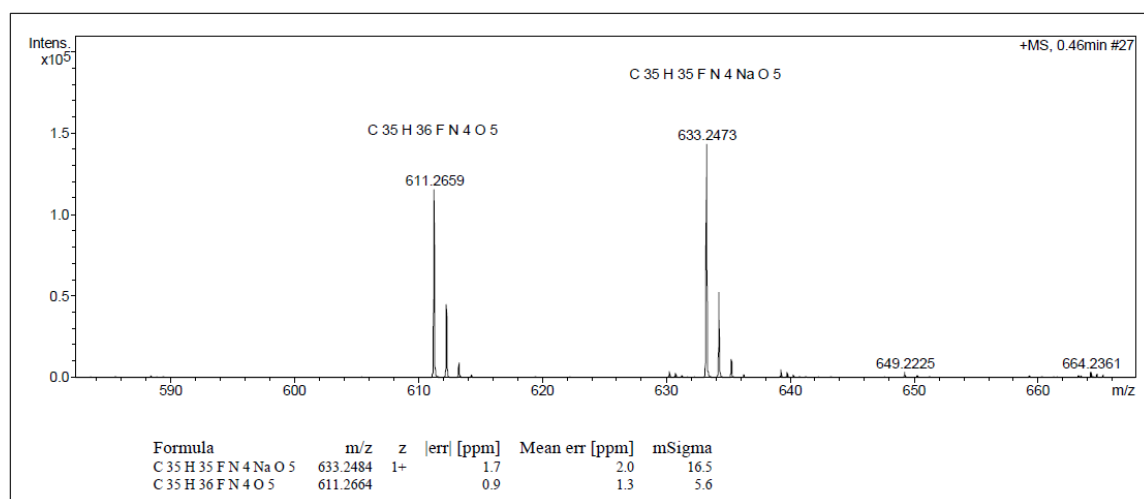

**Figure S2.** Mass spectrometer characterization data of **CF-OE 2**.

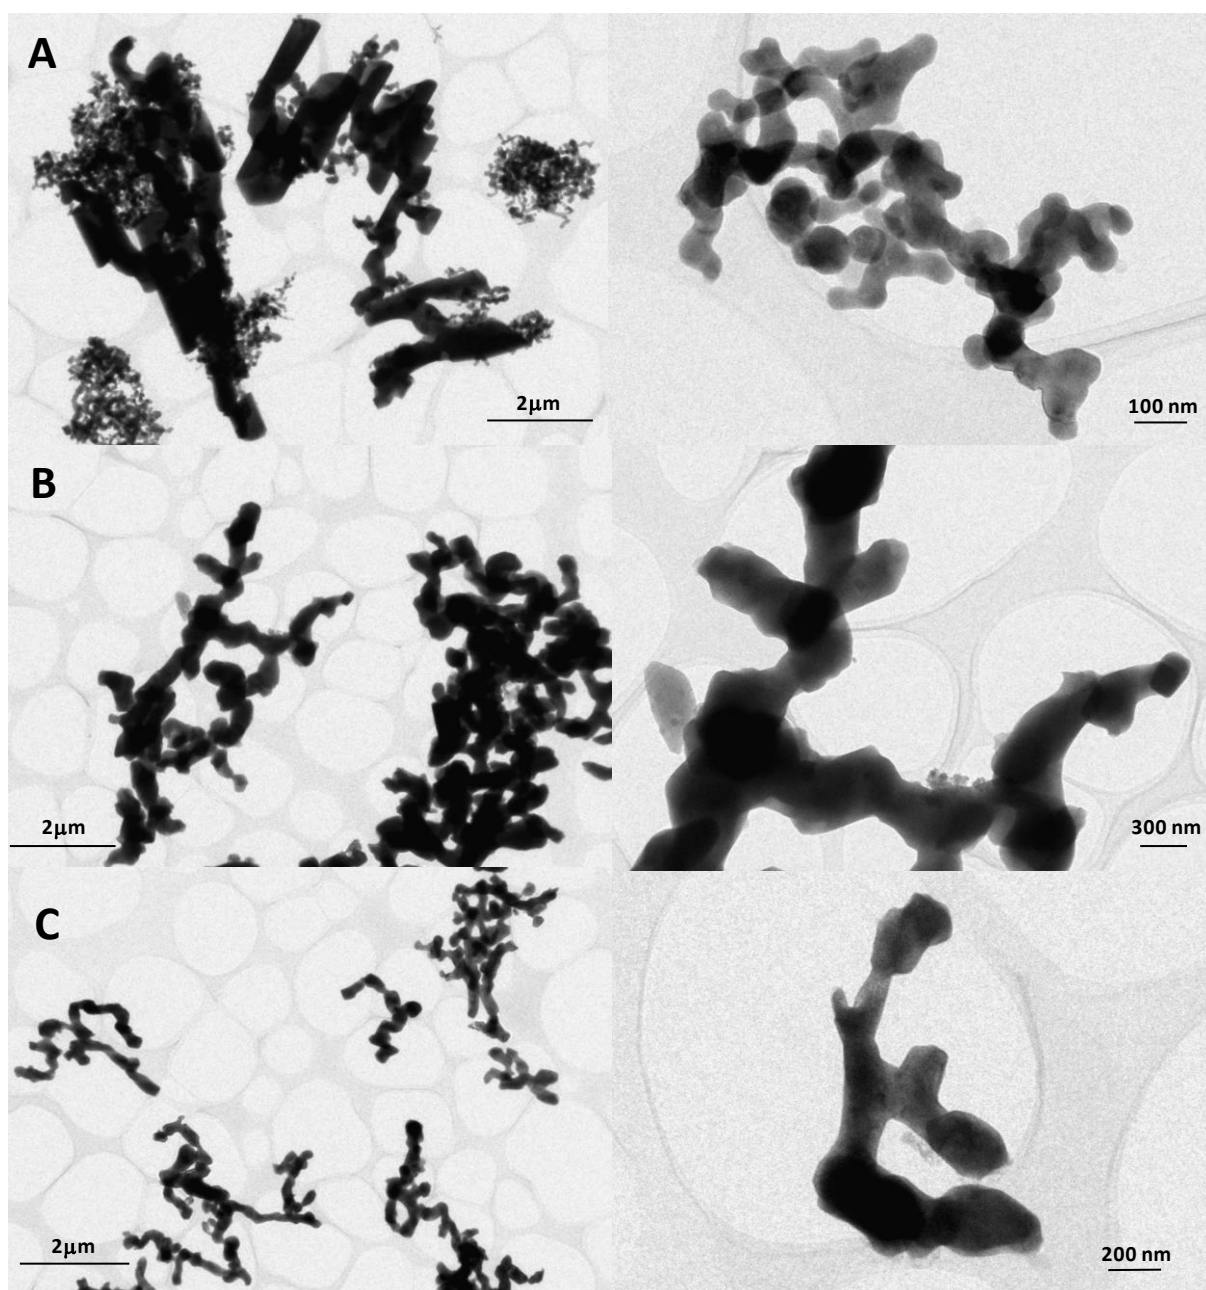

**Figure S3.** TEM images of A) UC1; B) UC2 and; C) UC3

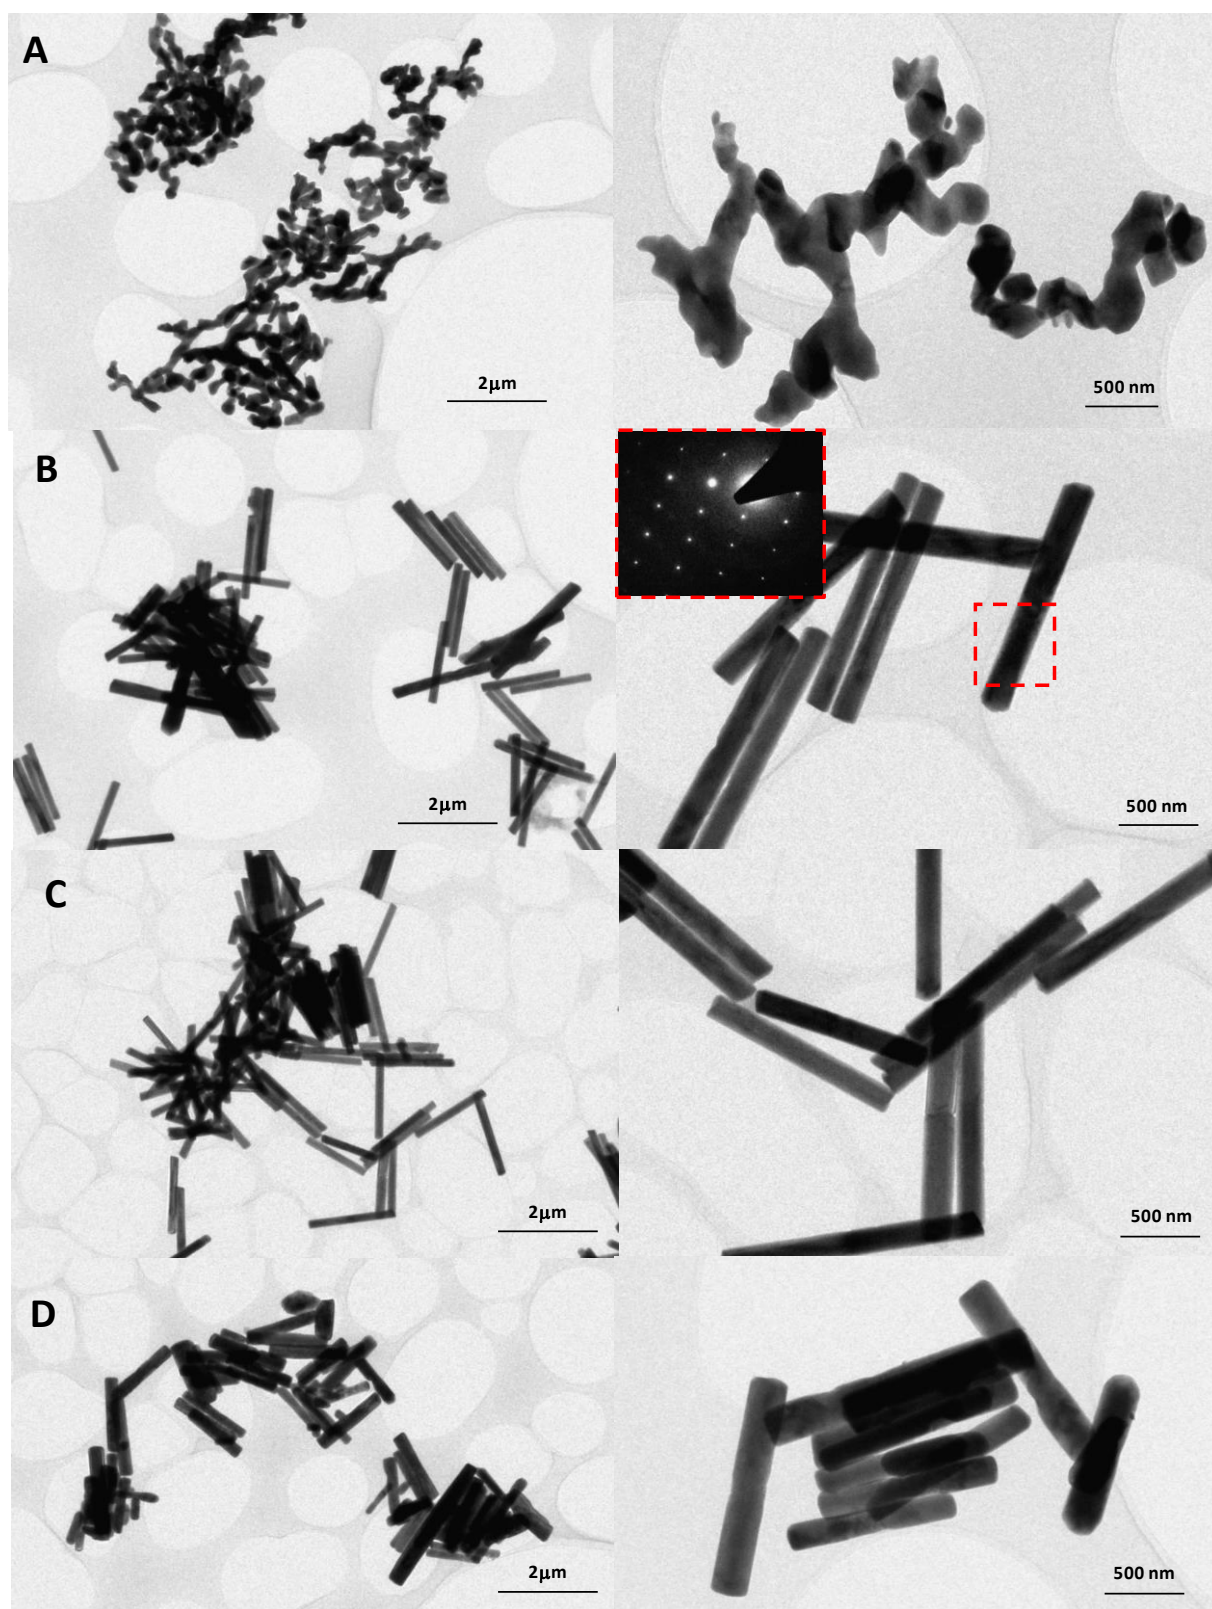

**Figure S4.** TEM images of A) UC4; B) UC5, C) UC6 and; D) UC7. Inset in figure S2C correspond to electron diffraction of red squared area.

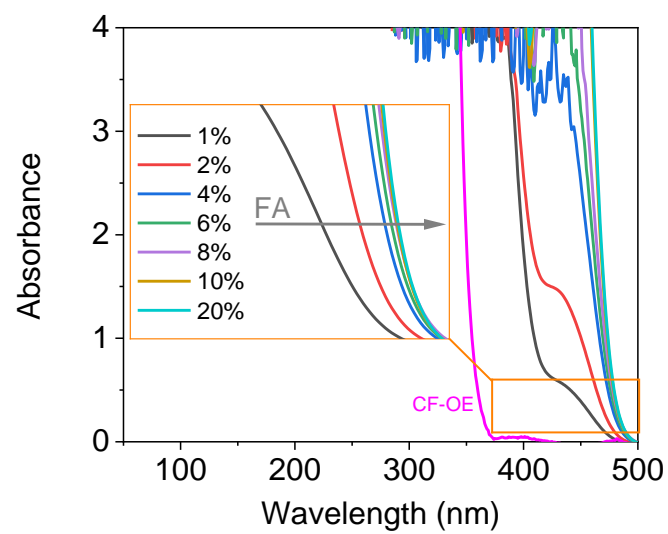

**Figure S5.** Absorption spectra of CF-OE (pink, 0.5 mM) in the presence of increasing amounts of formic acid (% v/v). Inset: zoom image.



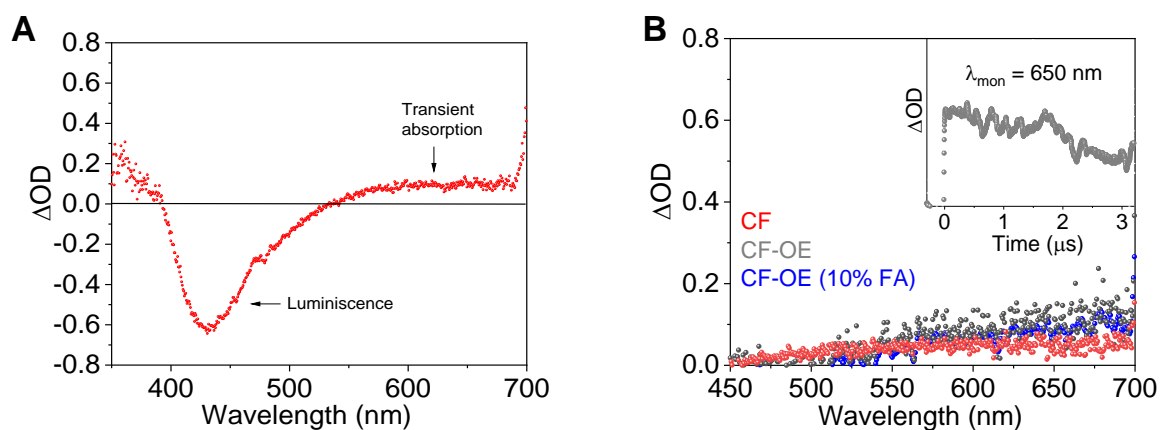

**Figure S6.** A) Transient absorption spectrum (TAS,  $\lambda_{exc} = 355$  nm) for CF in deaerated dichloromethane solution immediately after the laser pulse and B) upon 100 ns for CF (red), CF-OE (black) or CF-OE un acidic media (blue) in deaerated dichloromethane solutions. Inset: decay trace monitored at 650 nm for CF-OE as model.

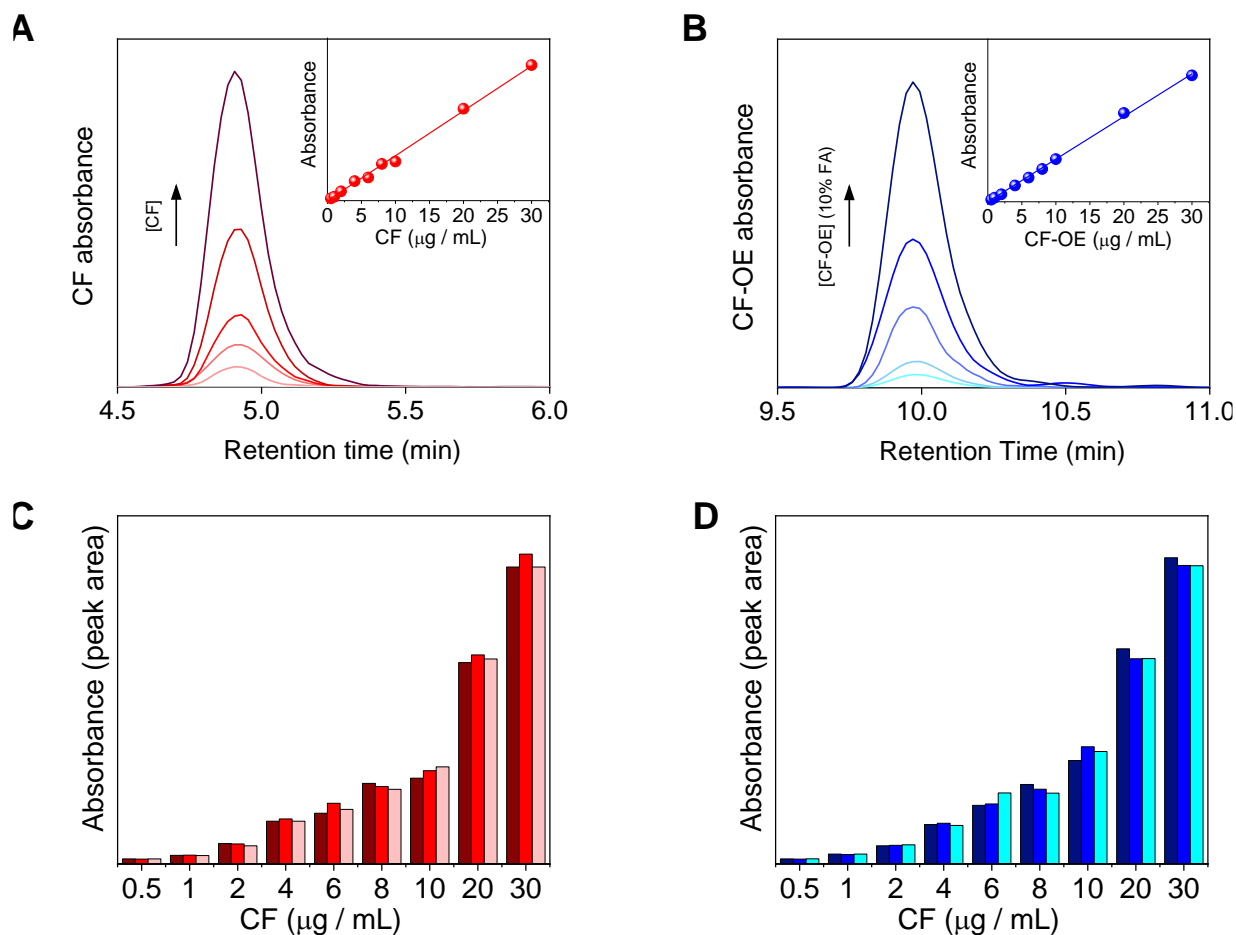

**Figure S7.** A and B) HPLC chromatograms for CF (A) and CF-OE (B) upon increasing concentration in aerated 70:50  $\text{H}_2\text{O} : \text{CH}_3\text{CN}$ , containing 0.1% of FA. Inset: corresponding linear calibration curve. C and D) Calibration curve for CF (C) and CF-OE (D). The measurements were performed by triplicated for each compound.

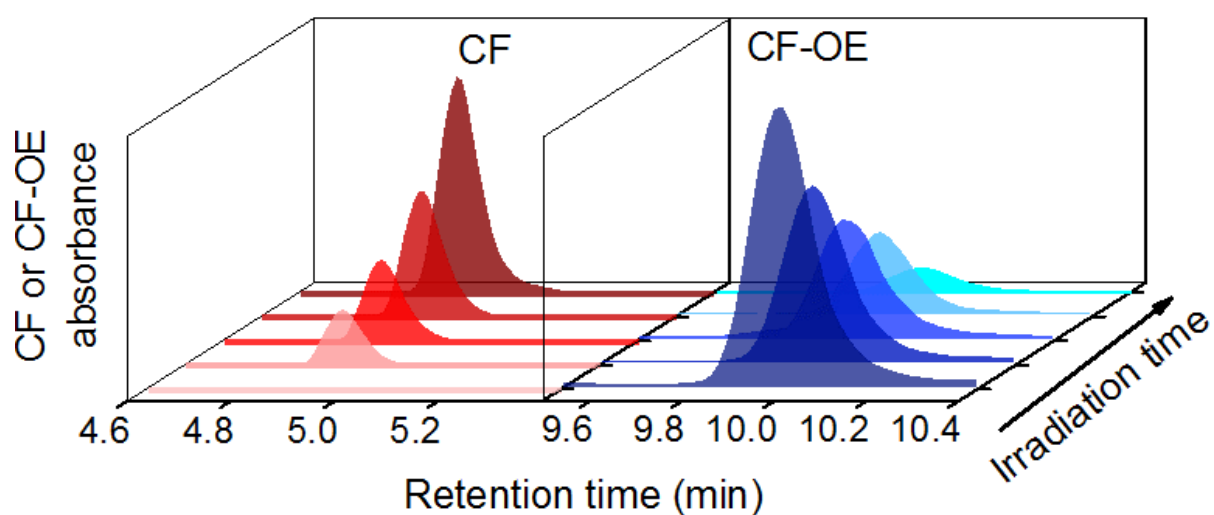

**Figure S8.** HPLC chromatograms of the evolution formation of free CF (red) and disappearance of CF-OE compound (blue) upon increasing irradiation times ( $\lambda_{\text{exc}} = 980$  nm), at 0.5 M of CF-OE in deaerated methylene chloride (10 % FA v/v). The mobile phase used in HPLC analysis was 70:50 H<sub>2</sub>O : CH<sub>3</sub>CN, containing 0.1% of FA.

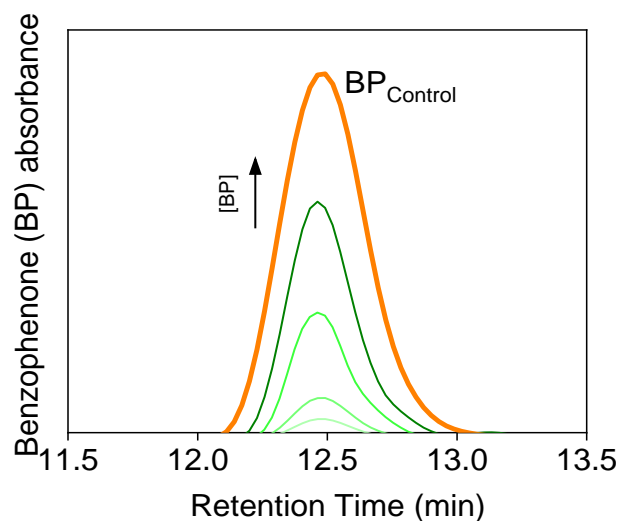

**Figure S9.** HPLC chromatograms of the formation of the benzophenone (BP) as a second product upon increasing irradiation times ( $\lambda_{\text{exc}} = 980 \text{ nm}$ ), at 0.5 mM of CF-OE in deaerated methylene chloride (10 % FA v/v). The mobile phase used in HPLC analysis was 70:50 H<sub>2</sub>O : CH<sub>3</sub>CN, containing 0.1% of FA. The orange trace corresponds to the commercial BP reference.

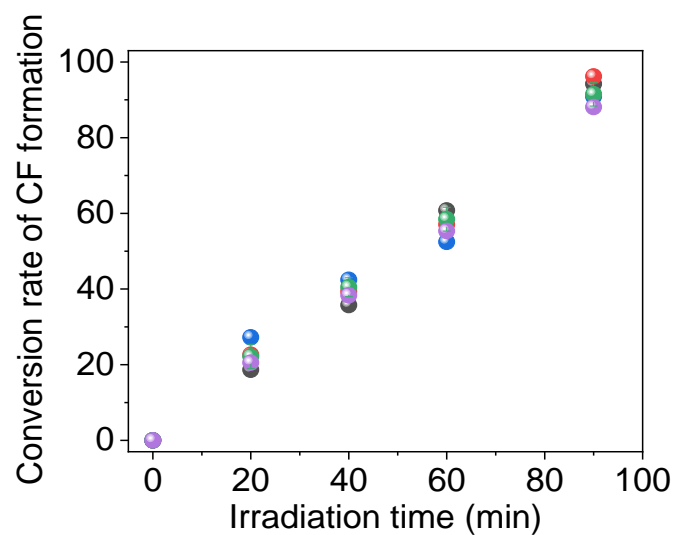

**Figure S10.** Reusability of UC3 by monitoring the conversion rate of the formation of CF upon increasing irradiation times ( $\lambda_{\text{exc}} = 980 \text{ nm}$ ) during five consecutive cycles. Cycle 1 to 5: black, red, blue, green and purple, respectively.
